# Supplementary material for: Prostaglandin E2 stimulates β1-integrin expression in hepatocellular carcinoma through the EP1 receptor/PKC/NF-κB pathway
Source: PubMed Central journal article supplement — Sci Rep. 2014 Oct 7;4:6538. doi: 10.1038/srep06538 (PMC5377465; doi:10.1038/srep06538), 2014-10-07
Supplement: srep06538-s1.pdf [file srep06538-s1.pdf]

## Supplementary Information

Prostaglandin E<sub>2</sub> stimulates  $\beta$ 1-integrin expression in hepatocellular carcinoma through the EP1 receptor/PKC/NF- $\kappa$ B pathway

Xiaoming Bai <sup>a</sup>, Jie Wang <sup>b</sup>, Yan Guo <sup>c</sup>, Jinshun Pan <sup>d</sup>, Qinyi Yang <sup>a</sup>, Min Zhang <sup>a</sup>, Hai Li <sup>a</sup>, Li Zhang <sup>a</sup>, Juan Ma <sup>a</sup>, Feng Shi <sup>a</sup>, Wei Shu <sup>e</sup>, Yipin Wang <sup>a</sup>, Jing Leng <sup>a,\*</sup>

<sup>a</sup> Cancer Center, Department of Pathology, Nanjing Medical University, Nanjing 210029, P. R. China

<sup>b</sup> Department of Pathology, Jiangsu Province Hospital of Traditional Chinese Medicine, Nanjing 210029, P. R. China

<sup>c</sup> Institute of Pediatrics, Fourth Clinical Medical College, Nanjing Medical University, Nanjing 210029, P. R. China

<sup>d</sup> The Center of Metabolic Disease Research, Nanjing Medical University, Nanjing 210029, P. R. China

<sup>e</sup> Department of Periodontal, Institute of Stomatology, The Stomatological Hospital Affiliated to Nanjing Medical University, Nanjing 210029, P. R. China

\* Corresponding author. Tel.: 86-25-86862685; fax: 86-25-86862684.

E-mail address: lengjing@njmu.edu.cn

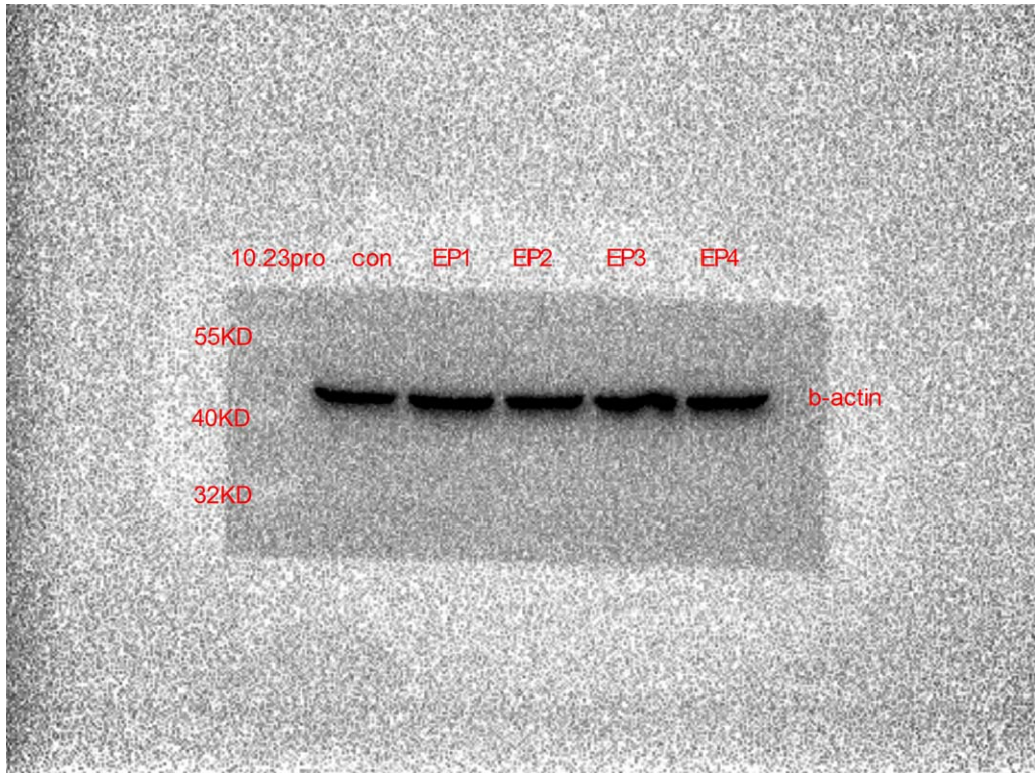

Figure S1. Effects of EP agonists on  $\beta$ 1-integrin expression in Huh-7 cells.

Huh-7 cells were exposed to 5  $\mu$ M EP1 agonist (17-PT-PGE<sub>2</sub>), EP2 agonist (butaprost), EP3 agonist (sulprostone) and EP4 agonist (PGE1 alcohol) for 24 h, respectively. Total protein were collected. The gels have been run under the same experimental conditions. The anti- $\beta$ -actin antibody was added.

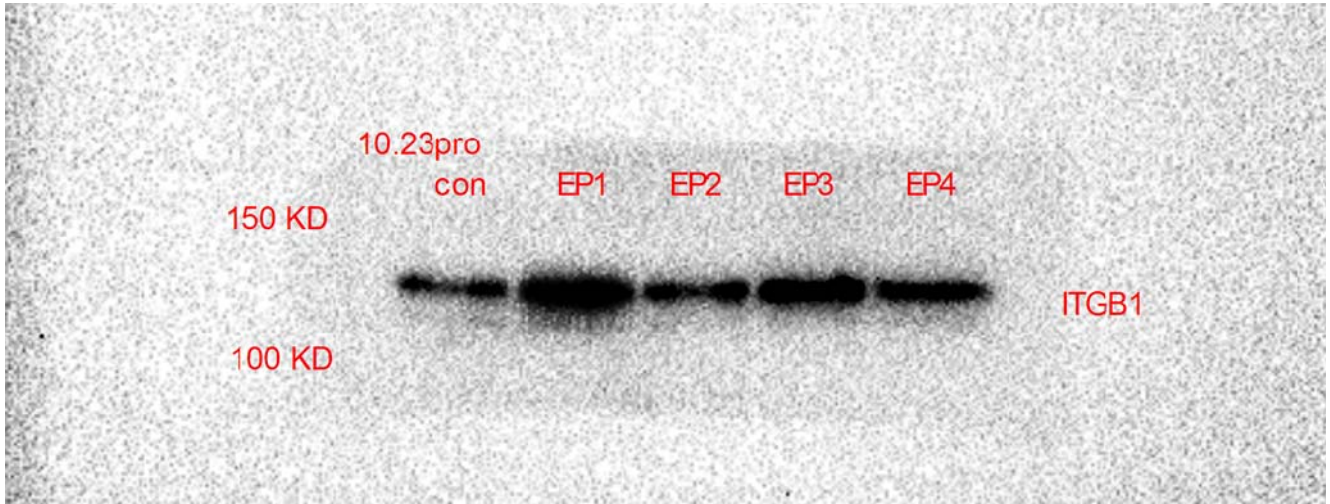

Figure S2. Effects of EP agonists on  $\beta$ 1-integrin expression in Huh-7 cells.

Huh-7 cells were exposed to 5  $\mu$ M EP1 agonist (17-PT-PGE<sub>2</sub>), EP2 agonist (butaprost), EP3 agonist (sulprostone) and EP4 agonist (PGE1 alcohol) for 24 h, respectively. Total protein were collected. The gels have been run under the same experimental conditions. The anti- $\beta$ 1 integrin antibody was added.

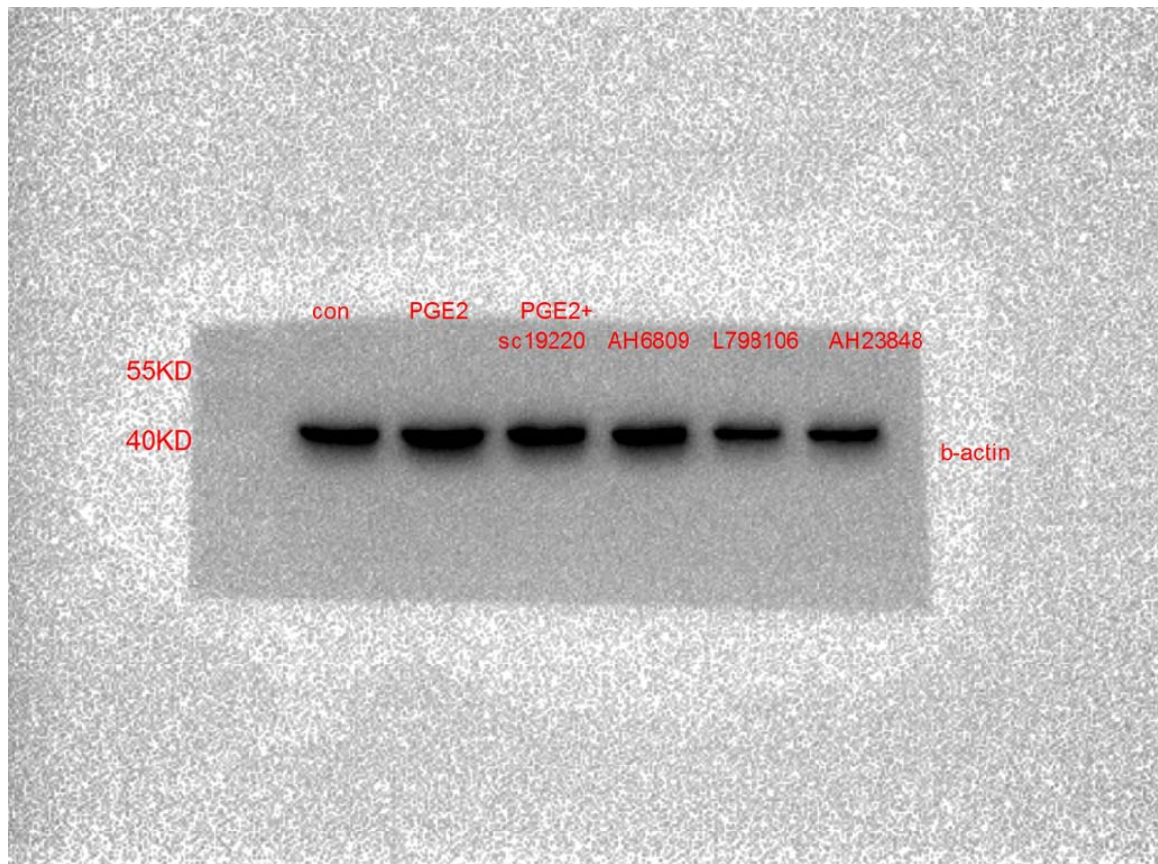

Figure S3. Effects of EP antagonists on PGE<sub>2</sub>-mediated  $\beta$ 1-integrin expression in Huh-7 cells.

Huh-7 cells were pretreated with various EP antagonists for 1 h, followed by PGE<sub>2</sub> for 24 h (EP1 antagonist sc19220, EP2 antagonist AH6809 and EP3 antagonist L-798106, EP4 antagonist AH23848). Total protein were collected. The gels have been run under the same experimental conditions. The anti- $\beta$ -actin antibody was added.

11.30pro

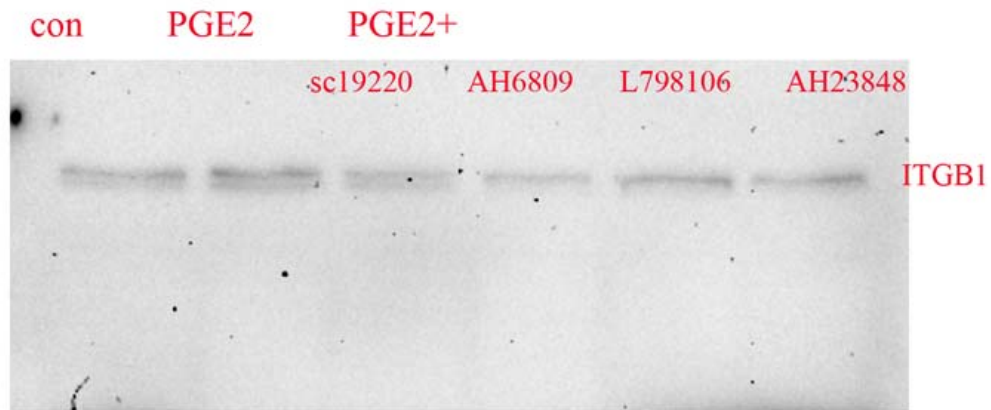

Figure S4. Effects of EP antagonists on PGE<sub>2</sub>-mediated  $\beta$ 1-integrin expression in Huh-7 cells.

Huh-7 cells were pretreated with various EP antagonists for 1 h, followed by PGE<sub>2</sub> for 24 h (EP1 antagonist sc19220, EP2 antagonist AH6809 and EP3 antagonist L-798106, EP4 antagonist AH23848). Total protein were collected. The gels have been run under the same experimental conditions. The anti- $\beta$ 1 integrin antibody was added.



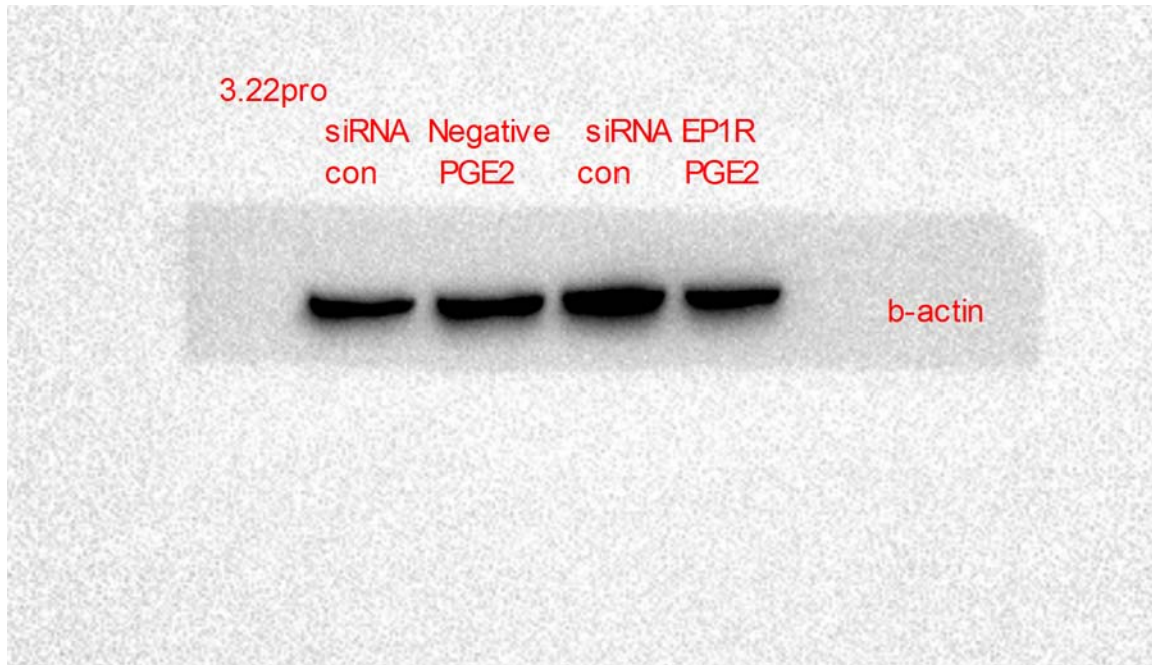

Figure S5. RNA interference targeting the EP1 receptor suppressed PGE<sub>2</sub>-mediated  $\beta$ 1-integrin upregulation in Huh-7 cells.

Huh-7 cells were transfected with an EP1R-siRNA. After 72h, the cells were exposed to PGE<sub>2</sub> for 24 h. Total protein were collected. The gels have been run under the same experimental conditions. The anti- $\beta$ -actin antibody was added.

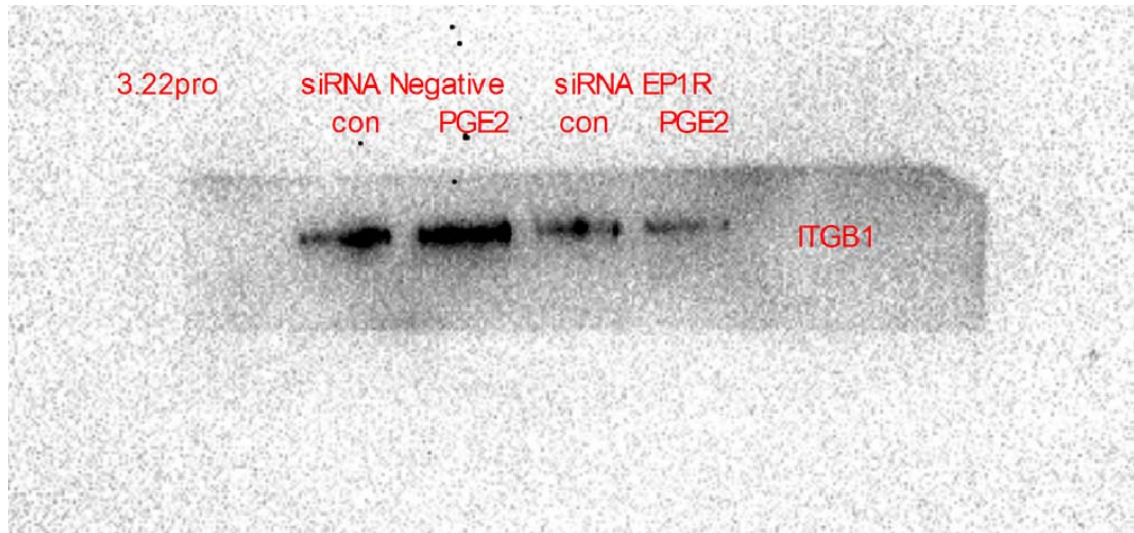

Figure S6. RNA interference targeting the EP1 receptor suppressed PGE<sub>2</sub>-mediated  $\beta$ 1-integrin upregulation in Huh-7 cells.

Huh-7 cells were transfected with an EP1R-siRNA. After 72h, the cells were exposed to PGE<sub>2</sub> for 24 h. Total protein were collected. The gels have been run under the same experimental conditions. The anti- $\beta$ 1 integrin antibody was added.

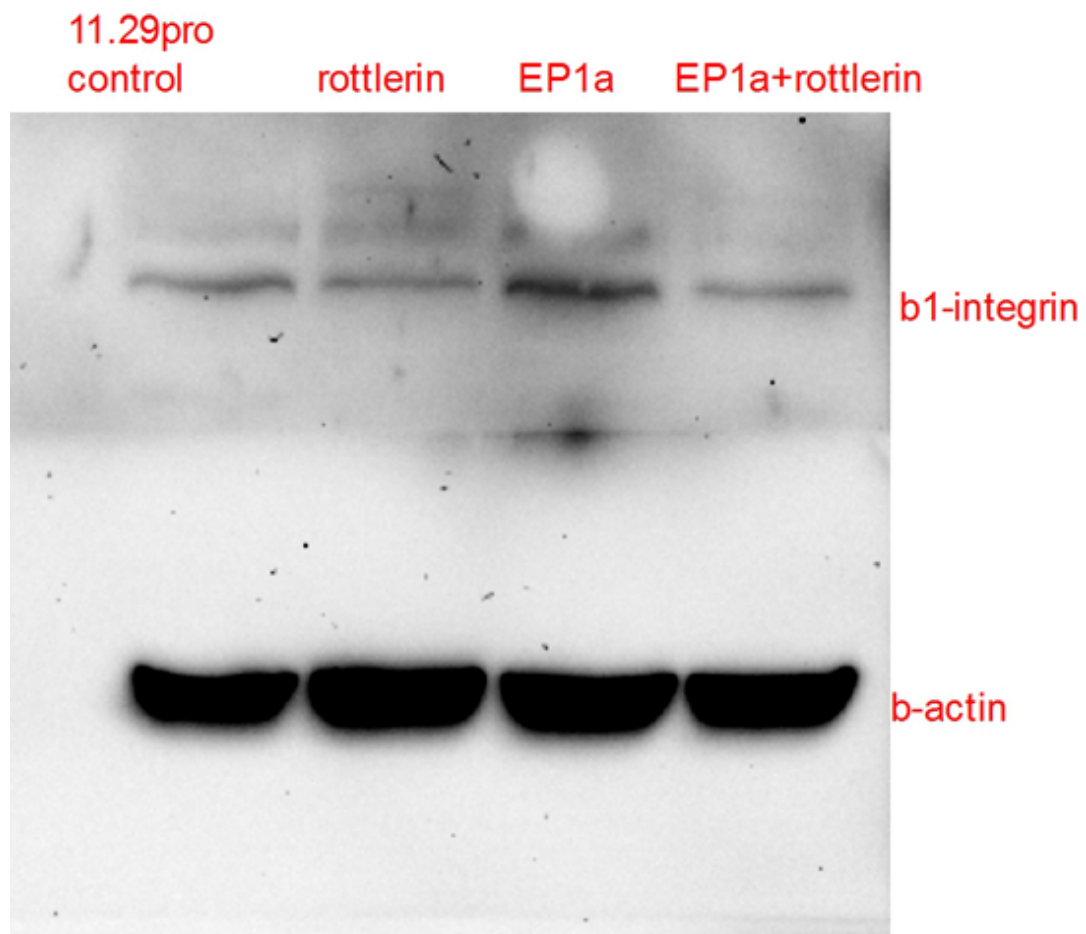

Figure S7. Effect of PKC inhibitor rottlerin on 17-PT-PGE<sub>2</sub>-mediated  $\beta$ 1-integrin expression in Huh-7 cells.

Huh-7 cells were treated with 17-PT-PGE<sub>2</sub> for 24 h, with or without pre-treatment of 5  $\mu$ M rottlerin for 1 h. Total protein were collected. The gels have been run under the same experimental conditions. The anti- $\beta$ 1 integrin antibody and anti- $\beta$ -actin antibody were added at the same time.



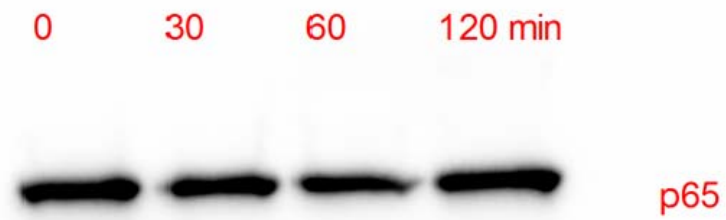

Figure S8. Effects of 17-PT-PGE<sub>2</sub> on NF- $\kappa$ B and I $\kappa$ B phosphorylation in Huh-7 cells. Huh-7 cells were treated with 5  $\mu$ M 17-P-T-PGE<sub>2</sub> for 0, 30, 60, 120 min. Total protein were collected. The gels have been run under the same experimental conditions. The anti-p65 antibody was added.

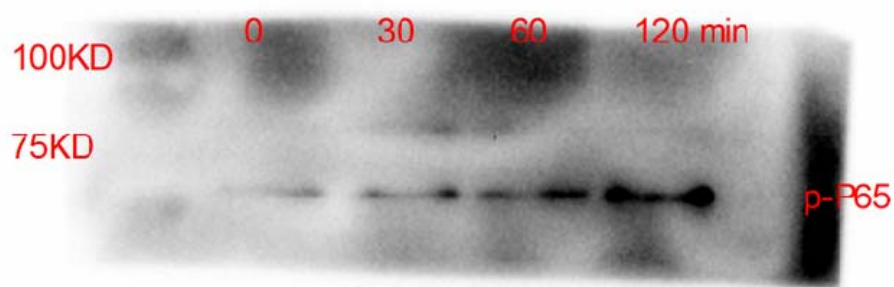

Figure S9. Effects of 17-PT-PGE<sub>2</sub> on NF-κB and IκB phosphorylation in Huh-7 cells. Huh-7 cells were treated with 5 μM 17-P-T-PGE<sub>2</sub> for 0, 30, 60, 120 min. Total protein were collected. The gels have been run under the same experimental conditions. The anti-phospho-p65 antibody was added.

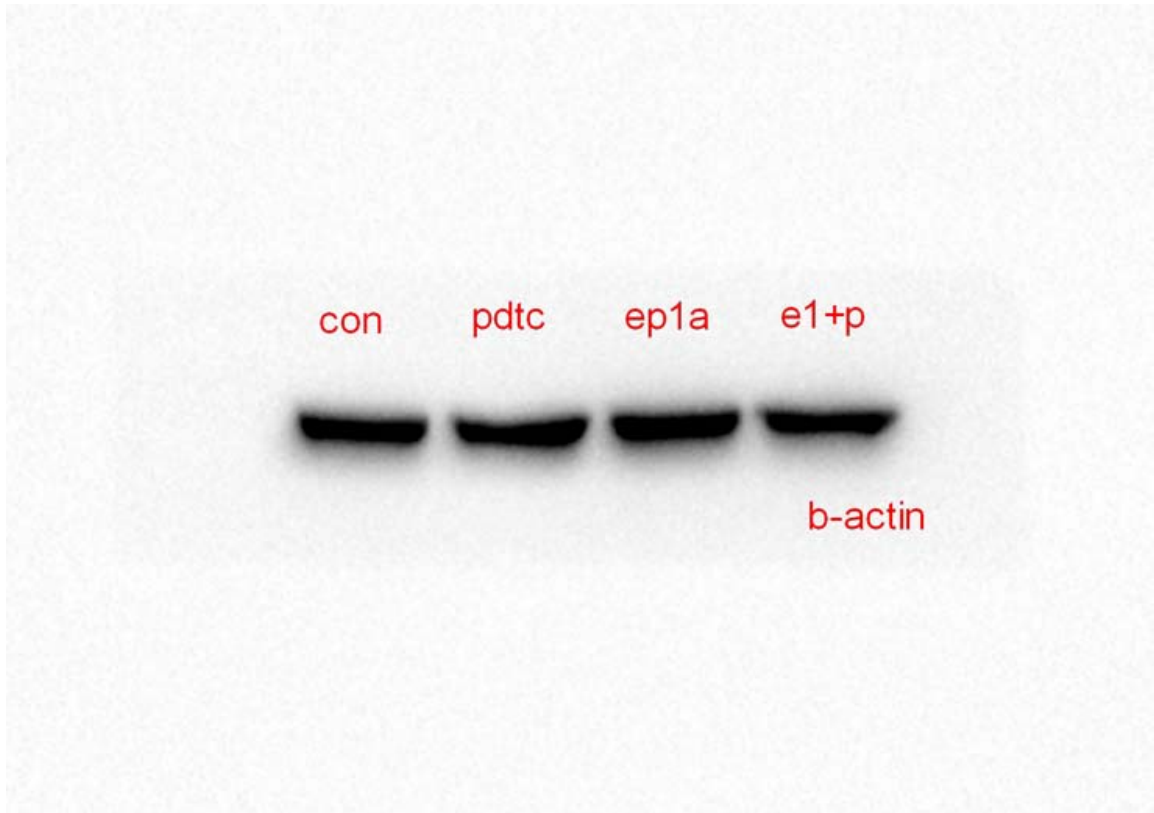

Figure S10. Effect of NF- $\kappa$ B inhibitor PDTC on 17-PT-PGE<sub>2</sub>-mediated  $\beta$ 1-integrin expression in Huh-7 cells.

Huh-7 cells were treated with 17-PT-PGE<sub>2</sub> for 24 h, with or without pre-treatment of PDTC for 24 h. Total protein were collected. The gels have been run under the same experimental conditions. The anti- $\beta$ -actin antibody was added.

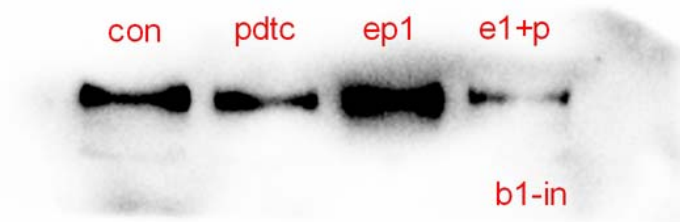

Figure S11. Effect of NF- $\kappa$ B inhibitor PDTC on 17-PT-PGE<sub>2</sub>-mediated  $\beta$ 1-integrin expression in Huh-7 cells.

Huh-7 cells were treated with 17-PT-PGE<sub>2</sub> for 24 h, with or without pre-treatment of PDTC for 24 h. Total protein were collected. The gels have been run under the same experimental conditions. The anti- $\beta$ 1 integrin antibody was added.

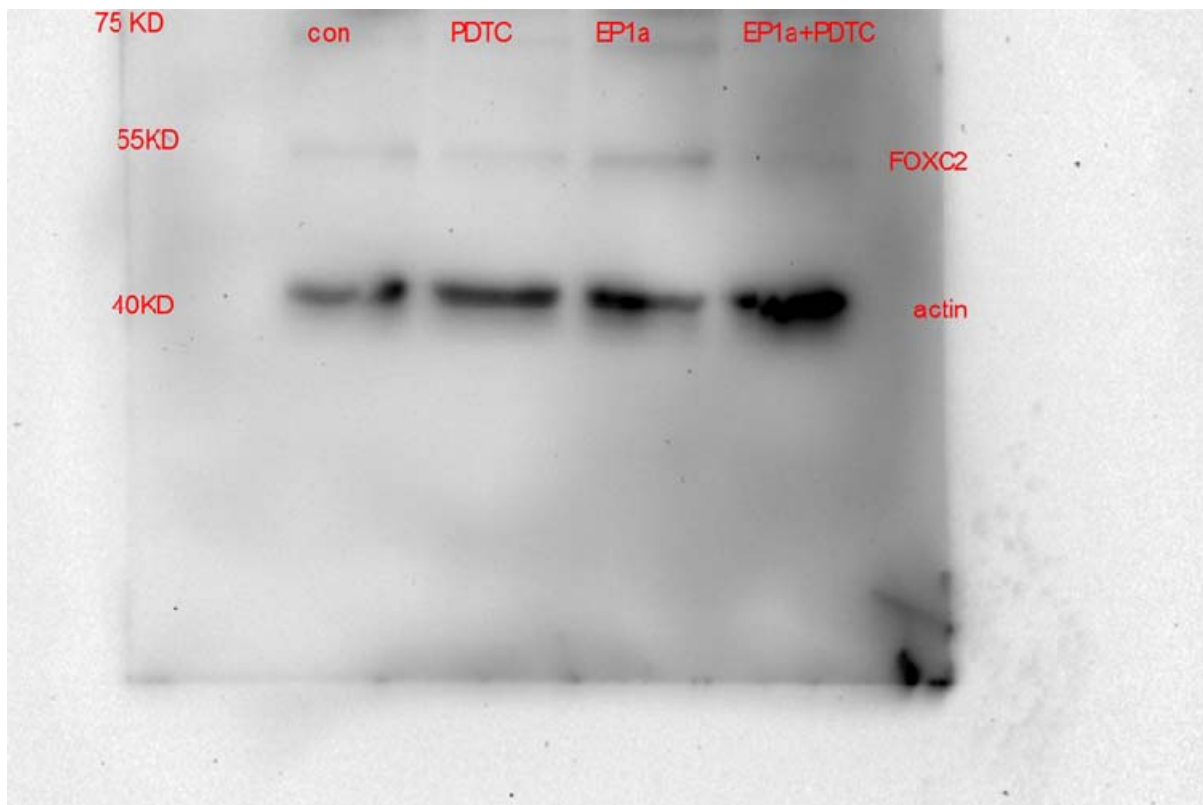

Figure S12. Effect of NF- $\kappa$ B inhibitor PDTC in EP1 receptor-mediated FoxC2 upregulation in Huh-7 cells.

Huh-7 cells were treated with 17-PT-PGE<sub>2</sub> for 24 h, with or without pre-treatment of PDTC for 24 h. Total protein were collected. The gels have been run under the same experimental conditions. The anti-FoxC2 antibody and anti- $\beta$ -actin antibody were added at the same time.
